# Supplementary material for: Early ecological responses of bentho-demersal communities to new Fishery No-Take Zones in the NW Mediterranean: evidence of passive restoration
Source: Research Square preprint supplement (doi:10.21203/rs.3.rs-8258388/v1), 2026-01-08
Supplement: Supplementary file 1 [file e2118416cc7b55aeb54c0715.docx]

# SUPPLEMENTARY MATERIAL

| Table 1. Metadata information for the video transects recorded during the research campaigns. The table includes information on the surveyed area, protection regime, recording date and start time (UTC), geographic coordinates at the start and end of each transect (latitude and longitude), depth range (m), total duration of analysed video footage, closure year of each Fishery No-Take Zone (FNTZ), total imaged surface (m²), number of substrata (Nº su), and bathymetric range. All geographic coordinates are in decimal minutes (° ′) and referenced to WGS-84. “Closure year” refers to the year in which the Fishery No-Take Zone (FNTZ) was officially implemented. “–” = not applicable (Control areas). | | | | | | | | | | | | | | | | |
| --- | --- | --- | --- | --- | --- | --- | --- | --- | --- | --- | --- | --- | --- | --- | --- | --- |
| **Area No.** | **Area name** | **Acronym** | **Regime** | **Date** | **Lat. Start** | **Lon. Start** | **Lat. End** | **Lon. End** | **Depth start (m)** | **Depth end (m)** | **Start time (UTC)** | **Duration (hh:mm:ss)** | **Closure year** | **Total imaged surface (m²)** | **Nº su** | **Bathymetric range** |
| 1 | Área de interés pesquero para la merluza de Roses | Mer_Ros | Control | 30 Nov 2024 | 42° 05.839′ N | 3° 22.729′ E | 42° 05.155′ N | 3° 22.290′ E | 129.5 | 126.6 | 07:48:00 | 02:12:00 | – | 710 | 142 | Shelf edge |
| 1 | Área de interés pesquero para la merluza de Roses | Mer_Ros | FNTZ | 05 May 2023 | 42° 09.640′ N | 3° 25.029′ E | 42° 08.163′ N | 3° 25.076′ E | 131.2 | 136.5 | 06:40:40 | 04:53:11 | 2013 | 1410 | 282 | Shelf edge |
| 1 | Área de interés pesquero para la merluza de Roses | Mer_Ros | FNTZ | 05 May 2023 | 42° 06.478′ N | 3° 25.727′ E | 42° 05.182′ N | 3° 25.256′ E | 147.9 | 146.5 | 12:26:00 | 04:28:04 | 2013 | 1220 | 244 | Shelf edge |
| 2 | Área de interés pesquero Roses–Palamós | Cig_RP | Control | 07 May 2023 | 42° 05.134′ N | 3° 34.083′ E | 42° 04.581′ N | 3° 33.839′ E | 394.3 | 373.3 | 07:11:39 | 02:05:10 | – | 520 | 104 | Upper slope |
| 2 | Área de interés pesquero Roses–Palamós | Cig_RP | FNTZ | 07 May 2023 | 42° 00.577′ N | 3° 31.974′ E | 41° 58.951′ N | 3° 31.556′ E | 374.1 | 386.0 | 11:05:50 | 02:04:39 | 2017 | 675 | 135 | Upper slope |
| 3 | Bol de Terra a Vapor de Palamós | Bol_Terr | FNTZ | 13 May 2023 | 41° 42.580′ N | 3° 21.863′ E | 41° 41.140′ N | 3° 21.044′ E | 186.4 | 193.8 | 07:01:00 | 05:30:14 | 2021 | 1435 | 287 | Shelf edge |
| 3 | Bol de Terra a Vapor de Palamós | Bol_Terr | FNTZ | 12 May 2023 | 41° 43.045′ N | 3° 22.126′ E | 41° 42.572′ N | 3° 21.855′ E | 184.4 | 186.5 | 15:13:25 | 02:02:12 | 2021 | 495 | 99 | Shelf edge |
| 3/6 | Bol de Terra a Vapor de Palamós / Área de repoblación Blanes-Palamós | Bol_Terr / Rep_BLP | Control | 14 May 2023 | 41° 37.622′ N | 3° 21.966′ E | 41° 36.742′ N | 3° 20.983′ E | 286.6 | 290.6 | 06:59:20 | 03:50:03 | – | 1060 | 212 | Shelf edge |
| 4 | Cigala de Palamós | Cig_Pal | Control | 14 May 2023 | 41° 41.122′ N | 3° 27.694′ E | 41° 41.700′ N | 3° 28.497′ E | 368.0 | 389.2 | 12:59:09 | 01:41:16 | – | 755 | 151 | Upper slope |
| 4 | Cigala de Palamós | Cig_Pal | FNTZ | 09 May 2023 | 41° 43.367′ N | 3° 28.393′ E | 41° 40.762′ N | 3° 27.597′ E | 363.1 | 370.7 | 07:15:10 | 03:50:01 | 2021 | 1035 | 207 | Upper slope |
| 5 | Bol de les Bruixes | Bol_Bru | FNTZ-Control | 11 May 2023 | 41° 35.827′ N | 3° 09.877′ E | 41° 35.575′ N | 3° 10.981′ E | 147.1 | 147.6 | 06:48:25 | 04:53:12 | 2021 | 1935 | 387 | Shelf edge |
| 6 | Área de repoblación Blanes-Palamós | Rep_BLP | FNTZ | 13 May 2023 | 41° 34.540′ N | 3° 13.909′ E | 41° 34.282′ N | 3° 13.195′ E | 244.9 | 204.7 | 15:03:25 | 02:02:40 | 2017 | 550 | 110 | Shelf edge |
| 7 | Merluza de Arenys | Mer_Are | Control | 18 May 2023 | 41° 29.673′ N | 2° 41.874′ E | 41° 29.517′ N | 2° 41.183′ E | 133.2 | 129.7 | 15:04:35 | 02:06:00 | – | 405 | 81 | Shelf edge |
| 7 | Merluza de Arenys | Mer_Are | FNTZ | 19 May 2023 | 41° 29.667′ N | 2° 45.185′ E | 41° 29.217′ N | 2° 44.379′ E | 153.8 | 153.8 | 10:41:30 | 02:35:15 | 2021 | 700 | 140 | Shelf edge |
| 7 | Merluza de Arenys | Mer_Are | FNTZ | 01 May 2023 | 41° 30.813′ N | 2° 06.932′ E | 41° 30.006′ N | 2° 45.050′ E | 143.0 | 147.8 | 16:24:00 | 03:10:11 | 2021 | 715 | 143 | Shelf edge |
| 8 | Cigala de Barcelona | Cig_Bar | Control | 10 May 2023 | 41° 13.645′ N | 2° 12.746′ E | 41° 12.975′ N | 2° 12.414′ E | 374.2 | 385.9 | 08:14:10 | 02:31:59 | – | 675 | 135 | Upper slope |
| 8 | Cigala de Barcelona | Cig_Bar | FNTZ | 10 May 2023 | 41° 16.275′ N | 2° 26.566′ E | 41° 16.492′ N | 2° 28.143′ E | 404.7 | 398.5 | 13:11:20 | 04:03:27 | 2021 | 1115 | 223 | Upper slope |
| 9 | Merluza de Barcelona | Mer_Bar | Control | 04 May 2023 | 41° 13.988′ N | 2° 07.515′ E | 41° 13.484′ N | 2° 06.635′ E | 96.2 | 97.4 | 15:10:44 | 02:05:30 | – | 765 | 153 | Shelf edge |
| 9 | Merluza de Barcelona | Mer_Bar | FNTZ | 04 May 2023 | 41° 11.819′ N | 2° 06.924′ E | 41° 12.368′ N | 2° 07.833′ E | 160.2 | 163.4 | 11:23:20 | 01:59:21 | 2021 | 695 | 139 | Shelf edge |
| 10 | Merluza de Vilanova | Mer_Vil | Control | 03 May 2023 | 41° 07.183′ N | 1° 59.382′ E | 41° 06.612′ N | 1° 57.904′ E | 213.6 | 216.6 | 13:39:00 | 02:22:57 | – | 815 | 163 | Shelf edge |
| 10 | Merluza de Vilanova | Mer_Vil | FNTZ | 03 May 2023 | 41° 07.476′ N | 1° 58.568′ E | 41° 07.876′ N | 2° 00.035′ E | 133.9 | 147.7 | 07:03:10 | 02:31:15 | 2021 | 530 | 106 | Shelf edge |
| 11 | Cigala de Vilanova | Cig_Vil | Control | 04 May 2023 | 41° 05.339′ N | 1° 58.181′ E | 41° 05.465′ N | 1° 58.885′ E | 398.5 | 394.9 | 07:27:55 | 02:02:48 | – | 440 | 88 | Upper slope |
| 11 | Cigala de Vilanova | Cig_Vil | FNTZ | 02 May 2023 | 41° 03.490′ N | 1° 55.036′ E | 41° 04.702′ N | 1° 54.370′ E | 714.5 | 317.7 | 10:00:50 | 02:44:16 | 2021 | 725 | 145 | Upper slope |


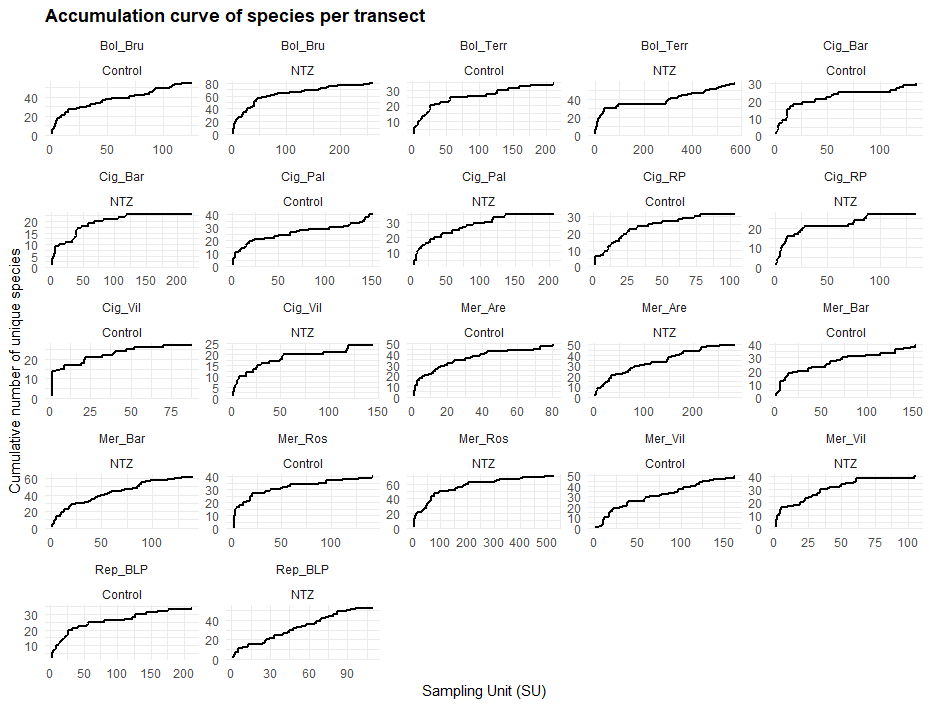


Figure 1. Species Accumulation Curves across transects in all study sites for different protection regimes (i.e,. FNTZ and Control areas).

| **Table 2. Operational Taxonomic Units (OTUs) detected in video transects. along with their corresponding taxonomic classification. The 'OTU' column indicates the final taxonomic label assigned to each morphologically distinct unit used for subsequent analyses.** | | | | | | | |
| --- | --- | --- | --- | --- | --- | --- | --- |
| **Phylum** | **Subphylum** | **Class** | **Order** | **Family** | **Genus** | **Species** | **OTU** |
| **Annelida** | NA | Polychaeta | Echiuroidea | Bonelliidae | Bonellia | *Bonellia viridis* | *Bonellia viridis* |
|  |  |  | Sabellida | Chaetopteridae | Mesochaetopterus | *Mesochaetopterus rogeri* | *Mesochaetopterus rogeri* |
|  |  |  |  | Sabellidae | NA | NA | Sabellida |
|  |  |  |  |  | Myxicola | *Myxicola infundibulum* | *Myxicola infundibulum* |
|  |  |  |  | Serpulidae | Filograninae | NA | Filograninae |
|  |  |  |  |  | Protula | *Protula tubularia* | *Protula tubularia* |
|  |  |  |  |  | Salmacina | NA | *Salmacina* spp. |
| **Arthropoda** | Crustacea | Malacostraca | Decapoda | Diogenidae | Dardanus | *Dardanus arrosor* | *Dardanus arrosor* |
|  |  |  |  | Goneplacidae | Goneplax | *Goneplax rhomboides* | *Goneplax rhomboides* |
|  |  |  |  | Homolidae | NA | NA | Homolidae |
|  |  |  |  | Inachidae | Inachus | NA | *Inachus* spp. |
|  |  |  |  |  | Macropodia | NA | *Macropodia* spp. |
|  |  |  |  | Munididae | Iridonida | *Iridonida speciosa* | *Iridonida speciosa* |
|  |  |  |  |  | Munida | *Munida intermedia* | *Munida intermedia* |
|  |  |  |  | Nephropidae | Nephrops | *Nephrops norvegicus* | *Nephrops norvegicus* |
|  |  |  |  | Pandalidae | Plesionika | *Plesionika heterocarpus* | *Plesionika heterocarpus* |
|  |  |  |  |  | Plesionika | NA | *Plesionika* spp. |
|  |  |  |  | Parthenopidae | NA | NA | Parthenopidae |
|  |  |  |  | Polybiidae | Liocarcinus | NA | *Liocarcinus* spp. |
|  |  |  |  |  | Macropipus | *Macropipus tuberculatus* | *Macropipus tuberculatus* |
|  |  |  |  | Xanthidae | Monodaeus | *Monodaeus couchii* | *Monodaeus couchii* |
|  |  |  |  | NA | NA | NA | Brachyura |
|  |  |  |  | NA | NA | NA | Decapoda |
|  |  |  |  | NA | NA | NA | Eubrachyura |
|  |  |  |  | NA | NA | NA | Paguroidea |
|  |  |  |  | NA | NA | NA | Portunoidea |
|  |  |  | Isopoda | Cirolanidae | Cirolana | NA | Cirolana |
| **Bryozoa** | Bryozoa | NA | NA | NA | NA | NA | Bryozoa |
|  |  |  |  |  |  | NA | Bryozoa sp1 |
|  |  |  |  |  |  | NA | Yellow fanshaped Bryozoa |
| **Chordata** | Vertebrata | Actinopterygii | Acanthuriformes | Caproidae | Capros | *Capros aper* | *Capros aper* |
|  |  |  | Anguilliformes | NA | NA | NA | Anguilliformes |
|  |  |  |  | Ophichthidae | Ophisurus | *Ophisurus serpens* | *Ophisurus serpens* |
|  |  |  | Argentiniformes | Argentinidae | Argentina | *Argentina sphyraena* | *Argentina sphyraena* |
|  |  |  | Aulopiformes | Chlorophthalmidae | Chlorophthalmus | *Chlorophthalmus agassizi* | *Chlorophthalmus agassizi* |
|  |  |  |  | Paralepididae | Arctozenus | *Arctozenus risso* | *Arctozenus risso* |
|  |  |  | Callionymiformes | Callionymidae | Synchiropus | *Synchiropus phaeton* | *Synchiropus phaeton* |
|  |  |  | Carangiformes | Carangidae | Trachurus | *Trachurus trachurus* | *Trachurus trachurus* |
|  |  |  | Gadiformes | Gadidae | Gadiculus | *Gadiculus argenteus* | *Gadiculus argenteus* |
|  |  |  |  |  | Micromesistius | *Micromesistius poutassou* | *Micromesistius poutassou* |
|  |  |  |  |  | Trisopterus | *Trisopterus capelanus* | *Trisopterus capelanus* |
|  |  |  |  | Lotidae | Molva | *Molva dypterygia* | *Molva dypterygia* |
|  |  |  |  | Macrouridae | Coelorinchus | *Coelorinchus caelorhincus* | *Coelorinchus caelorhincus* |
|  |  |  |  |  | Hymenocephalus | *Hymenocephalus italicus* | *Hymenocephalus italicus* |
|  |  |  |  | Merlucidae | Merluccius | *Merluccius merluccius* | *Merluccius merluccius* |
|  |  |  |  | Phycidae | Phycis | *Phycis blennoides* | *Phycis blennoides* |
|  |  |  |  | NA | NA | NA | Gadiformes |
|  |  |  | Gobiiformes | Gobiidae | Crystallogobius | *Crystallogobius linearis* | *Crystallogobius linearis* |
|  |  |  |  |  | Deltentosteus | *Deltentosteus quadrimaculatus* | *Deltentosteus quadrimaculatus* |
|  |  |  |  |  | Lesueurigobius | *Lesueurigobius suerii* | *Lesueurigobius suerii* |
|  |  |  |  |  | NA | NA | Gobiidae |
|  |  |  |  |  |  |  | Gobiidae sp1 |
|  |  |  |  |  |  |  | Gobiidae sp2 |
|  |  |  |  |  |  |  | Gobiidae sp4 |
|  |  |  |  |  |  |  | Gobiidae sp5 |
|  |  |  | Lophiiformes | Lophiidae | Lophius | NA | Lophius spp. |
|  |  |  | Mulliformes | Mullidae | Mullus | *Mullus barbatus* | *Mullus barbatus* |
|  |  |  | Myctophiformes | Myctophidae | NA | NA | Myctophidae |
|  |  |  | Perciformes | Scorpaenidae | NA | NA | Scorpaenidae |
|  |  |  |  | Sebastidae | Helicolenus | *Helicolenus dactylopterus* | *Helicolenus dactylopterus* |
|  |  |  |  | Serranidae | NA | NA | Serranidae |
|  |  |  |  |  | Serranus | *Serranus hepatus* | *Serranus hepatus* |
|  |  |  |  | Trachinidae | Trachinus | NA | Trachinus spp. |
|  |  |  | Perciformes | Triglidae | Eutrigla | *Eutrigla gurnardus* | *Eutrigla gurnardus* |
|  |  |  |  | Triglidae | Trigla | Trigla | *Trigla* spp. |
|  |  |  |  |  | Trigla | *Trigla lyra* | *Trigla lyra* |
|  |  |  |  |  | NA | NA | Triglidae |
|  |  |  | Perciformes | NA | NA | NA | Perciformes |
|  |  |  | Pleuronectiformes | Bothidae | Arnoglossus | *Arnoglossus rueppelii* | *Arnoglossus rueppelii* |
|  |  |  |  | Cynoglossidae | Symphurus | NA | *Symphurus* spp. |
|  |  |  |  | Scophthalmidae | Lepidorhombus | *Lepidorhombus boscii* | *Lepidorhombus boscii* |
|  |  |  |  |  |  | *Lepidorhombus whiffiagonis* | *Lepidorhombus whiffiagonis* |
|  |  |  |  |  | NA | NA | Scophthalmidae |
|  |  |  |  | Soleidae | Microchirus | *Microchirus variegatus* | *Microchirus variegatus* |
|  |  |  |  | NA | NA | NA | Pleuronectiformes |
|  |  |  | Scombriformes | Scombridae | Thunnus | NA | Thunnus spp. |
|  |  |  | Scombriformes | Trichiuridae | Lepidopus | *Lepidopus caudatus* | *Lepidopus caudatus* |
|  |  |  | Stomiiformes | Stomiidae | Stomias | *Stomias boa* | *Stomias boa* |
|  |  |  | Syngnathiformes | Centriscidae | Macroramphosus | *Macroramphosus scolopax* | *Macroramphosus scolopax* |
|  |  | Chondrichthyes | Carcharhiniformes | Pentanchidae | Galeus | *Galeus melastomus* | *Galeus melastomus* |
|  |  |  |  | Scyliorhinidae | Scyliorhinus | *Scyliorhinus canicula* | *Scyliorhinus canicula* |
|  | Tunicata | NA | NA | NA | NA | NA | Tunicata |
|  |  | Ascidiacea | Aplousobranchia | Diazonidae | Diazona | *Diazona violacea* | *Diazona violacea* |
|  |  |  | Phlebobranchia | Ascidiidae | Ascidia | NA | Ascidia |
| Cnidaria | Anthozoa | Hexacorallia | Actiniaria | NA | NA | NA | Actiniaria |
|  |  |  |  | Andresiidae | Andresia | *Andresia partenopea* | *Andresia partenopea* |
|  |  |  |  | NA | Calliactis | *Calliactis parasitica* | *Calliactis parasitica* |
|  |  |  |  | NA | Capnea | *Capnea sanguinea* | *Capnea sanguinea* |
|  |  |  |  | Sagartiidae | Sagartia | NA | *Sagartia* spp. |
|  |  |  |  |  | NA | NA | Sagartiidae |
|  |  |  | Ceriantharia | Cerianthidae | Cerianthus | NA | Ceriantharia |
|  |  |  |  | Arachnactidae | Arachnanthus | *Arachnanthus oligopodus* | *Arachnanthus oligopodus* |
|  |  |  | Scleractinia | NA | Caryophyllia | *Caryophyllia smithii* | *Caryophyllia smithii* |
|  |  | Octocorallia | Malacalcyonacea | Alcyoniidae | Alcyonium | *Alcyonium acaule* | *Alcyonium acaule* |
|  |  |  |  | Alcyoniidae | Alcyonium | *Alcyonium palmatum* | *Alcyonium palmatum* |
|  |  |  |  | Paramuriceidae | Paramuricea | *Paramuricea grayi* | *Paramuricea grayi* |
|  |  |  |  | Paramuriceidae | Spinimuricea | NA | *Spinimuricea* spp. |
|  |  |  | Pennatulacea | Pennatulidae | Funiculina | *Funiculina quadrangularis* | *Funiculina quadrangularis* |
|  |  |  |  |  | Kophobelemnon | NA | *Kophobelemnon* spp. |
|  |  |  |  |  | Pennatula | *Pennatula rubra* | *Pennatula rubra* |
|  |  |  |  |  | NA | NA | Pennatulidae |
|  |  |  |  |  | Pteroeides | *Pteroeides griseum* | *Pteroeides griseum* |
|  |  |  |  |  | Veretillum | *Veretillum cynomorium* | *Veretillum cynomorium* |
|  |  |  | Scleralcyonacea | NA | NA | *Cavernularia pusilla* | *Cavernularia pusilla* |
|  | Medusozoa | Hydrozoa | NA | NA | NA | NA | Hydrozoa |
|  |  |  | Leptothecata | Aglaopheniidae | Lytocarpia | *Lytocarpia myriophyllum* | *Lytocarpia myriophyllum* |
|  |  |  |  | Plumariidae | Nemertesia | *Nemertesia* spp. | Nemertesia spp. |
|  |  |  |  | Sertulariidae | Sertularella | *Sertularella gayi* | *Sertularella gayi* |
|  |  |  | Narcomedusae | NA | NA | NA | Narcomedusae |
| Echinodermata | Eleutherozoa | Asteroidea | Valvatacea | Anseropodidae | Anseropoda | *Anseropoda placenta* | *Anseropoda placenta* |
|  |  |  |  |  | Astropecten | NA | *Astropecten* spp. |
|  |  |  |  |  |  | *Astropecten irregularis* | *Astropecten irregularis* |
|  |  | Holothuroidea | Actinopoda | Holothuriidae | Holothuria | NA | *Holothuria* spp. |
|  |  |  |  | Stichopodidae | Parastichopus | *Parastichopus regalis* | *Parastichopus regalis* |
|  |  | Ophiuroidea | Myophiuroida | Ophiocomidae | Ophiocomina | *Ophiocomina nigra* | *Ophiocomina nigra* |
|  |  |  |  | Ophiotrichidae | Ophiothrix | *Ophiothrix fragilis* | *Ophiothrix fragilis* |
|  |  |  |  | Ophiuridae | Ophiura | *Ophiura ophiura* | *Ophiura ophiura* |
|  |  |  |  | NA | NA | NA | Ophiuroidea |
|  | Echinozoa | Echinoidea | Euechinoidea | Echinidae | Gracilechinus | *Gracilechinus acutus* | *Gracilechinus acutus* |
|  |  |  |  | Spatangidae | Spatangus | *Spatangus purpureus* | *Spatangus purpureus* |
|  | Pelmatozoa | Crinoidea | NA | NA | NA | NA | Crinoidea |
| Mollusca | NA | NA | NA | NA | NA | NA | Mollusca |
|  | NA | Bivalvia | NA | NA | NA | NA | Bivalvia |
|  | NA | Cephalopoda | NA | NA | NA | NA | Cephalopoda |
|  |  |  | Myopsida | Loliginidae | Alloteuthis | NA | *Alloteuthis* spp. |
|  |  |  |  |  | Loligo | NA | *Loligo* spp. |
|  |  |  | Octopoda | Octopodidae | Eledone | *Eledone cirrhosa* | *Eledone cirrhosa* |
|  |  |  | Oegopsida | Ommastrephidae | Illex | NA | *Illex* spp. |
|  |  |  | Sepiida | Sepioidea | NA | NA | *Sepia* spp. |
|  |  |  |  |  | Sepia | *Sepia orbignyana* | *Sepia orbignyana* |
|  |  |  |  |  | NA | NA | *Sepiola* spp. |
|  |  |  |  |  | NA | NA | Sepiolidae |
|  |  | Gastropoda | Muricoidea | Muricidae | NA | NA | Muricidae |
|  |  |  | Ringipleura | NA | NA | NA | Nudibranchia |
|  |  |  |  | Pleurobranchidae | Pleurobranchus | *Pleurobranchus membranaceus* | *Pleurobranchus membranaceus* |
|  |  |  |  | Tethydidae | Tethys | *Tethys fimbria* | *Tethys fimbria* |
|  |  |  | Tectipleura | Cymbuliidae | Cymbulia | *Cymbulia peronii* | *Cymbulia peronii* |
|  |  |  | NA | NA | NA | NA | Gastropoda |
| Porifera | NA | Demospongiae | Axinellida | Axinellidae | Axinella | NA | *Axinella* spp. |
|  |  |  | NA | NA | NA | NA | Demospongiae |
|  |  |  | Haplosclerida | Chalinidae | Dendroxea | *Dendroxea lenis* | *Dendroxea lenis* |
|  |  |  | Polymastiida | Polymastiidae | Polymastia | NA | *Polymastia* spp. |
|  |  |  | Suberitida | Suberitidae | Rhizaxinella | NA | *Rhizaxinella* spp. |
|  |  |  |  |  | Suberites | *Suberites carnosus* | *Suberites carnosus* |
|  |  |  |  |  |  | *Suberites syringella* | *Suberites syringella* |
|  |  |  | Tethyida | Tethyidae | Tethya | NA | *Tethya* spp. |
|  |  |  | Tetractinellida | Geodiidae | Geodia | NA | *Geodia* spp. |
|  |  |  |  | Vulcanellidae | Poecillastra | *Poecillastra compressa* | *Poecillastra compressa* |
|  |  | NA | NA | NA | NA | NA | Encrusting range porifera |
|  |  |  |  |  |  |  | Encrusting white |
|  |  |  |  |  |  |  | Encrusting yellow porifera |
|  |  |  |  |  |  |  | Porifera |
|  |  |  |  |  |  |  | Porifera sp1 |
|  |  |  |  |  |  |  | White stalked Porifera |

| **Table 3.** *Mean density (individuals·m⁻²). standard deviation (SD). and number of observations (n) of representative sessile and motile taxa recorded across bathymetric ranges (shelf edge and upper slope) under two protection regimes: Control and Fishery No-Take Zones (FNTZs). Missing values (--) indicate taxa not observed under the corresponding regime.* | | | | | | | | |
| --- | --- | --- | --- | --- | --- | --- | --- | --- |
| **Bat. Range** | **Motility** | **OTU** | **Protection regime** | | | | | |
| **Control** | | | **FNTZ** | | |
| **Mean density** | **SD** | **n** | **Mean density** | **SD** | **n** |
| Shelf edge | Motile | *Alloteuthis* spp | -- | -- | -- | 0.20 | 0.00 | 2 |
|  |  | *Anseropoda placenta* | 0.20 | 0.00 | 2 | -- | -- | -- |
|  |  | *Arctozenus risso* | 0.20 | 0.00 | 2 | -- | -- | -- |
|  |  | *Argentina sphyraena* | 0.33 | 0.19 | 208 | 0.30 | 0.22 | 416 |
|  |  | *Arnoglossus rueppelii* | -- | -- | -- | 0.20 | 0.00 | 18 |
|  |  | *Astropecten irregularis* | 0.24 | 0.09 | 55 | 0.22 | 0.05 | 77 |
|  |  | *Astropecten* sp | 0.23 | 0.07 | 16 | -- | -- | -- |
|  |  | Bivalvia | 0.20 | -- | 1 | 0.20 | 0.00 | 3 |
|  |  | Brachyura | 0.20 | 0.00 | 3 | 0.26 | 0.10 | 7 |
|  |  | *Capros aper* | 0.20 | 0.00 | 4 | 0.23 | 0.09 | 24 |
|  |  | Cephalopoda | 0.20 | -- | 1 | 0.20 | -- | 1 |
|  |  | *Cepola macrophthalma* | 0.20 | -- | 1 | 0.20 | -- | 1 |
|  |  | *Chlorophthalmus agassizi* | -- | -- | -- | 0.20 | -- | 1 |
|  |  | *Coelorinchus caelorhincus* | 0.20 | 0.00 | 7 | 0.22 | 0.06 | 65 |
|  |  | *Crystallogobius linearis* | 0.20 | -- | 1 | 0.23 | 0.08 | 7 |
|  |  | *Dardanus arrossor* | 0.20 | -- | 1 | 0.20 | 0.00 | 8 |
|  |  | *Deltentosteus quadrimaculatus* | -- | -- | -- | 0.20 | -- | 1 |
|  |  | *Eledone cirrhosa* | 0.21 | 0.05 | 19 | 0.24 | 0.10 | 27 |
|  |  | Eubrachyura | -- | -- | -- | 0.20 | 0.00 | 5 |
|  |  | *Eutrigla gurnardus* | -- | -- | -- | 0.20 | 0.00 | 3 |
|  |  | *Gadiculus argenteus* | 0.21 | 0.04 | 24 | 0.23 | 0.08 | 75 |
|  |  | Gadiformes | 0.20 | -- | 1 | -- | -- | -- |
|  |  | *Galeus melastomus* | 0.20 | 0.00 | 2 | -- | -- | -- |
|  |  | Gastropoda | -- | -- | -- | 0.20 | 0.00 | 4 |
|  |  | Gobiidae | 0.25 | 0.10 | 110 | 0.22 | 0.06 | 172 |
|  |  | Gobiidae sp1 | 0.21 | 0.05 | 15 | 0.22 | 0.07 | 113 |
|  |  | Gobiidae sp2 | 0.20 | 0.00 | 10 | 0.20 | 0.00 | 10 |
|  |  | Gobiidae sp4 | 0.20 | -- | 1 | 0.20 | 0.00 | 6 |
|  |  | Gobiidae sp5 | -- | -- | -- | 0.20 | -- | 1 |
|  |  | *Goneplax rhomboides* | 0.24 | 0.09 | 140 | 0.25 | 0.11 | 218 |
|  |  | *Gracilechinus acutus* | 0.20 | 0.00 | 2 | 0.21 | 0.05 | 41 |
|  |  | *Helicolenus dactylopterus* | 0.20 | 0.00 | 6 | 0.21 | 0.03 | 33 |
|  |  | *Holothuria* spp | -- | -- | -- | 0.20 | 0.00 | 5 |
|  |  | *Illex* spp | 0.20 | 0.00 | 2 | -- | -- | -- |
|  |  | *Inachus* spp | -- | -- | -- | 0.20 | -- | 1 |
|  |  | *Iridonida speciosa* | 0.20 | 0.00 | 2 | -- | -- | -- |
|  |  | *Lepidopus caudatus* | 0.20 | 0.00 | 4 | -- | -- | -- |
|  |  | *Lepidorhombus boscii* | 0.20 | 0.00 | 12 | 0.20 | 0.00 | 10 |
|  |  | *Lepidorhombus whiffiagonis* | -- | -- | -- | 0.20 | 0.00 | 17 |
|  |  | *Lesueurigobius suerii* | 0.23 | 0.08 | 53 | 0.22 | 0.07 | 91 |
|  |  | *Liocarcinus* spp | -- | -- | -- | 0.20 | -- | 1 |
|  |  | *Loligo* spp | -- | -- | -- | 0.20 | -- | 1 |
|  |  | *Lophius* spp | 0.20 | 0.00 | 2 | 0.20 | 0.00 | 4 |
|  |  | *Macropipus tuberculatus* | -- | -- | -- | 0.20 | -- | 1 |
|  |  | *Macropodia* spp | 0.20 | 0.00 | 2 | 0.20 | 0.00 | 6 |
|  |  | *Macroramphosus scolopax* | 0.20 | -- | 1 | 0.53 | 0.23 | 3 |
|  |  | *Merluccius merluccius* | 0.20 | 0.00 | 19 | 0.22 | 0.07 | 44 |
|  |  | *Microchirus variegatus* | 0.20 | 0.00 | 5 | 0.20 | 0.00 | 11 |
|  |  | *Micromesistius poutassou* | 0.20 | 0.00 | 3 | 0.25 | 0.10 | 4 |
|  |  | Mollusca | -- | -- | -- | 0.20 | -- | 1 |
|  |  | *Molva dypterygia* | 0.20 | 0.00 | 2 | 0.20 | 0.00 | 2 |
|  |  | *Monodaeus couchii* | 0.22 | 0.06 | 23 | 0.23 | 0.07 | 8 |
|  |  | *Mullus barbatus* | 0.30 | 0.14 | 2 | 0.25 | 0.18 | 11 |
|  |  | *Munida intermedia* | 0.20 | 0.00 | 18 | 0.40 | -- | 1 |
|  |  | Muricidae | -- | -- | -- | 0.20 | -- | 1 |
|  |  | Myctophidae | -- | -- | -- | 0.28 | 0.11 | 5 |
|  |  | *Nephrops norvegicus* | 0.20 | 0.00 | 2 | -- | -- | -- |
|  |  | Nudibranchia | -- | -- | -- | 0.20 | -- | 1 |
|  |  | *Ophiocomina nigra* | -- | -- | -- | 0.20 | 0.00 | 6 |
|  |  | *Ophiothrix fragilis* | -- | -- | -- | 0.40 | -- | 1 |
|  |  | *Ophisurus serpens* | 0.20 | 0.00 | 2 | 0.20 | 0.00 | 4 |
|  |  | *Ophiura ophiura* | 0.20 | 0.00 | 3 | 0.21 | 0.05 | 15 |
|  |  | Ophiuroidea | -- | -- | -- | 0.43 | 0.25 | 8 |
|  |  | Paguroidea | 0.20 | 0.00 | 3 | 0.20 | 0.00 | 4 |
|  |  | *Parastichopus regalis* | 0.20 | -- | 1 | 0.20 | 0.00 | 23 |
|  |  | Parthenopidae | 0.20 | -- | 1 | -- | -- | -- |
|  |  | Perciformes | -- | -- | -- | 0.20 | 0.00 | 3 |
|  |  | *Phycis blennoides* | 0.20 | 0.00 | 4 | 0.20 | 0.00 | 11 |
|  |  | *Plesionika* spp. | 0.21 | 0.05 | 33 | 0.22 | 0.06 | 12 |
|  |  | *Pleurobranchus membranaceus* | 0.20 | -- | 1 | 0.20 | 0.00 | 2 |
|  |  | Pleuronectiformes | 0.20 | 0.00 | 20 | 0.20 | 0.00 | 19 |
|  |  | Pleuronectiformes sp1 | 0.20 | 0.00 | 4 | 0.20 | -- | 1 |
|  |  | Portunoidea | -- | -- | -- | 0.20 | -- | 1 |
|  |  | Scophthalmidae | -- | -- | -- | 0.20 | 0.00 | 3 |
|  |  | Scorpaenidae | -- | -- | -- | 0.20 | 0.00 | 9 |
|  |  | *Scyliorhinus canicula* | 0.22 | 0.07 | 72 | 0.24 | 0.10 | 83 |
|  |  | *Sepia orbignyana* | 0.20 | -- | 1 | -- | -- | -- |
|  |  | *Sepia* spp. | 0.20 | 0.00 | 3 | 0.20 | 0.00 | 7 |
|  |  | *Sepiola* spp. | 0.20 | 0.00 | 2 | -- | -- | -- |
|  |  | Sepiolidae | 0.20 | 0.00 | 23 | 0.20 | -- | 1 |
|  |  | Serranidae | 0.20 | 0.00 | 3 | -- | -- | -- |
|  |  | *Serranus hepatus* | 0.20 | 0.00 | 12 | 0.20 | 0.00 | 2 |
|  |  | *Spatangus purpureus* | -- | -- | -- | 0.21 | 0.05 | 16 |
|  |  | *Symphurus* spp. | 0.20 | -- | 1 | -- | -- | -- |
|  |  | *Synchiropus phaeton* | -- | -- | -- | 0.20 | -- | 1 |
|  |  | *Tethys fimbria* | -- | -- | -- | 0.20 | 0.00 | 2 |
|  |  | *Trachinus* spp. | 0.20 | -- | 1 | 0.20 | -- | 1 |
|  |  | *Trachurus trachurus* | 0.87 | 0.88 | 109 | 0.87 | 0.46 | 3 |
|  |  | *Trigla lyra* | 0.20 | 0.00 | 5 | 0.21 | 0.05 | 29 |
|  |  | *Trigla* spp. | -- | -- | -- | 0.20 | 0.00 | 3 |
|  |  | Triglidae | 0.20 | 0.00 | 11 | 0.21 | 0.05 | 33 |
|  |  | *Trisopterus capelanus* | 0.21 | 0.04 | 28 | 0.21 | 0.05 | 16 |
|  | Sessile | Actiniaria | -- | -- | -- | 0.30 | 0.14 | 2 |
|  |  | *Alcyonium acaule* | 0.20 | 0.00 | 4 | -- | -- | -- |
|  |  | *Alcyonium palmatum* | 0.33 | 0.20 | 253 | 0.44 | 0.51 | 555 |
|  |  | *Amathia verticillata* | -- | -- | -- | 0.29 | 0.13 | 23 |
|  |  | *Andresia partenopea* | 0.21 | 0.06 | 58 | 0.30 | 0.16 | 365 |
|  |  | *Arachnanthus oligopodus* | -- | -- | -- | 0.49 | 0.46 | 17 |
|  |  | Ascidia | -- | -- | -- | 0.20 | 0.00 | 4 |
|  |  | *Axinella* spp. | -- | -- | -- | 0.20 | -- | 1 |
|  |  | *Bonellia viridis* | -- | -- | -- | 0.93 | 1.10 | 3 |
|  |  | Bryozoa | -- | -- | -- | 0.74 | 0.68 | 119 |
|  |  | *Calliactis parasitica* | -- | -- | -- | 0.37 | 0.23 | 6 |
|  |  | *Capnea sanguinea* | 0.20 | -- | 1 | 0.20 | 0.00 | 8 |
|  |  | *Caryophyllia (Caryophyllia) smithii* | -- | -- | -- | 0.20 | 0.00 | 5 |
|  |  | *Cavernularia pusilla* | 0.40 | 0.37 | 43 | 0.20 | 0.00 | 5 |
|  |  | Ceriantharia | 0.27 | 0.13 | 56 | 0.25 | 0.21 | 96 |
|  |  | Crinoidea | 0.56 | 0.72 | 101 | 2.15 | 4.49 | 288 |
|  |  | Demospongiae | -- | -- | -- | 0.24 | 0.09 | 5 |
|  |  | *Dendroxea lenis* | -- | -- | -- | 0.20 | -- | 1 |
|  |  | *Diazona violacea* | 0.20 | 0.00 | 5 | 0.24 | 0.10 | 77 |
|  |  | Encrusting orange porifera | -- | -- | -- | 0.20 | -- | 1 |
|  |  | Encrusting yellow porifera | -- | -- | -- | 0.20 | 0.00 | 4 |
|  |  | Filograninae | 0.20 | -- | 1 | 0.40 | 0.38 | 289 |
|  |  | *Funiculina quadrangularis* | 1.86 | 2.36 | 349 | 1.88 | 2.34 | 725 |
|  |  | *Geodia* spp. | -- | -- | -- | 0.20 | 0.00 | 5 |
|  |  | Hydrozoa | 0.35 | 0.10 | 4 | 0.35 | 0.48 | 35 |
|  |  | *Kophobelemnon* spp. | 0.20 | 0.00 | 5 | 0.20 | 0.00 | 6 |
|  |  | *Lytocarpia myriophyllum* | 0.26 | 0.12 | 104 | 0.32 | 0.26 | 263 |
|  |  | *Mesochaetopterus rogeri* | 0.20 | -- | 1 | 0.20 | -- | 1 |
|  |  | *Myxicola infundibulum* | 0.22 | 0.07 | 9 | 0.26 | 0.14 | 21 |
|  |  | *Nemertesia* spp. | -- | -- | -- | 0.20 | 0.00 | 2 |
|  |  | *Paramuricea grayi* | 0.20 | -- | 1 | -- | -- | -- |
|  |  | *Pennatula rubra* | 0.23 | 0.07 | 23 | 0.20 | 0.00 | 9 |
|  |  | Pennatulidae | 0.32 | 0.17 | 101 | 0.20 | 0.00 | 29 |
|  |  | *Poecillastra compressa* | 0.20 | 0.00 | 3 | 0.20 | -- | 1 |
|  |  | *Polymastia* spp. | -- | -- | -- | 0.20 | -- | 1 |
|  |  | Porifera | -- | -- | -- | 0.29 | 0.20 | 116 |
|  |  | Porifera sp1 | -- | -- | -- | 0.24 | 0.09 | 5 |
|  |  | *Protula tubularia* | 0.26 | 0.10 | 7 | 0.29 | 0.11 | 9 |
|  |  | *Pteroeides griseum* | 0.23 | 0.10 | 47 | 0.22 | 0.06 | 45 |
|  |  | *Rhizaxinella* spp. | 0.20 | 0.00 | 3 | 0.20 | 0.00 | 14 |
|  |  | Sabellida | 1.16 | 2.05 | 336 | 0.60 | 0.61 | 432 |
|  |  | *Sagartia* spp. | 0.20 | 0.00 | 4 | 0.34 | 0.31 | 60 |
|  |  | Sagartiidae | -- | -- | -- | 0.20 | -- | 1 |
|  |  | Salmacina | -- | -- | -- | 0.40 | -- | 1 |
|  |  | *Sertularella gayi* | 0.20 | -- | 1 | 0.30 | 0.12 | 4 |
|  |  | *Spinimuricea* spp. | 0.20 | -- | 1 | -- | -- | -- |
|  |  | *Suberites carnosus* | 0.20 | 0.00 | 3 | 0.22 | 0.06 | 80 |
|  |  | *Suberites syringella* | 0.20 | 0.00 | 4 | 0.27 | 0.21 | 71 |
|  |  | *Tethya* spp. | 0.20 | 0.00 | 5 | 0.20 | -- | 1 |
|  |  | Tunicata | 0.40 | -- | 1 | -- | -- | -- |
|  |  | *Veretillum cynomorium* | -- | -- | -- | 0.23 | 0.09 | 23 |
|  |  | White stalked Porifera | 0.40 | -- | 1 | 0.20 | 0.00 | 5 |
|  |  | Yellow fanshaped Bryozoa | 0.23 | 0.10 | 21 | 0.31 | 0.19 | 175 |
| Upper slope | Motile | *Alloteuthis* spp. | -- | -- | -- | 0.20 | 0.00 | 2 |
|  |  | Anguilliformes | 0.20 | -- | 1 | 0.20 | -- | 1 |
|  |  | *Arctozenus risso* | 0.25 | 0.14 | 35 | 0.20 | 0.00 | 13 |
|  |  | *Argentina sphyraena* | 0.20 | -- | 1 | -- | -- | -- |
|  |  | *Astropecten irregularis* | 0.20 | 0.00 | 2 | 0.20 | -- | 1 |
|  |  | Brachyura | 0.34 | 0.28 | 59 | 0.23 | 0.08 | 7 |
|  |  | *Chlorophthalmus agassizi* | 0.40 | -- | 1 | 0.20 | -- | 1 |
|  |  | Cirolana spp. | 0.20 | 0.00 | 5 | 0.27 | 0.12 | 3 |
|  |  | *Coelorinchus caelorhincus* | 0.20 | 0.00 | 2 | 0.23 | 0.07 | 25 |
|  |  | *Cymbulia peronii* | 0.20 | -- | 1 | -- | -- | -- |
|  |  | *Dardanus arrosor* | 0.27 | 0.10 | 9 | 0.20 | 0.00 | 7 |
|  |  | Decapoda | 0.20 | -- | 1 | -- | -- | -- |
|  |  | *Eledone cirrhosa* | 0.20 | 0.00 | 3 | 0.20 | -- | 1 |
|  |  | *Gadiculus argenteus* | 0.20 | -- | 1 | 0.20 | -- | 1 |
|  |  | *Galeus melastomus* | -- | -- | -- | 0.20 | -- | 1 |
|  |  | Gobiidae | 0.20 | -- | 1 | -- | -- | -- |
|  |  | Gobiidae sp5 | 0.20 | -- | 1 | -- | -- | -- |
|  |  | *Goneplax rhomboides* | 0.37 | 0.40 | 88 | 0.24 | 0.10 | 42 |
|  |  | *Helicolenus dactylopterus* | -- | -- | -- | 0.20 | 0.00 | 3 |
|  |  | Homolidae | 0.20 | -- | 1 | -- | -- | -- |
|  |  | *Hymenocephalus italicus* | 0.20 | -- | 1 | 0.20 | -- | 1 |
|  |  | *Illex* spp. | -- | -- | -- | 0.20 | 0.00 | 2 |
|  |  | *Lepidopus caudatus* | 0.23 | 0.08 | 13 | 0.39 | 0.32 | 30 |
|  |  | *Lepidorhombus boscii* | 0.20 | 0.00 | 25 | 0.24 | 0.08 | 10 |
|  |  | *Lepidorhombus whiffiagonis* | 0.20 | -- | 1 | -- | -- | -- |
|  |  | *Lophius* spp. | 0.20 | -- | 1 | 0.20 | -- | 1 |
|  |  | *Macropipus tuberculatus* | 0.24 | 0.09 | 5 | -- | -- | -- |
|  |  | *Macropodia* spp. | 0.20 | 0.00 | 2 | -- | -- | -- |
|  |  | *Merluccius merluccius* | 0.27 | 0.12 | 3 | 0.20 | -- | 1 |
|  |  | *Micromesistius poutassou* | -- | -- | -- | 0.20 | 0.00 | 2 |
|  |  | *Monodaeus couchii* | 0.30 | 0.20 | 48 | 0.22 | 0.06 | 10 |
|  |  | *Munida intermedia* | 0.24 | 0.13 | 28 | 0.20 | 0.00 | 7 |
|  |  | Myctophidae | 0.52 | 1.16 | 209 | 0.25 | 0.10 | 67 |
|  |  | *Nephrops norvegicus* | 0.21 | 0.05 | 14 | 0.21 | 0.05 | 16 |
|  |  | *Ophiura ophiura* | -- | -- | -- | 0.20 | -- | 1 |
|  |  | *Phycis blennoides* | 0.20 | 0.00 | 3 | 0.20 | 0.00 | 5 |
|  |  | *Plesionika heterocarpus* | -- | -- | -- | 0.20 | 0.00 | 3 |
|  |  | *Plesionika* spp. | 0.23 | 0.07 | 30 | 0.22 | 0.06 | 22 |
|  |  | Pleuronectiformes | 0.20 | 0.00 | 5 | 0.20 | -- | 1 |
|  |  | Portunoidea | 0.20 | -- | 1 | -- | -- | -- |
|  |  | *Scyliorhinus canicula* | 0.20 | -- | 1 | 0.20 | 0.00 | 9 |
|  |  | Sepiolidae | 0.27 | 0.16 | 6 | 0.20 | -- | 1 |
|  |  | *Stomias boa* | -- | -- | -- | 0.20 | 0.00 | 4 |
|  |  | *Tethys fimbria* | 0.20 | -- | 1 | -- | -- | -- |
|  |  | *Thunnus* spp. | 0.20 | 0.00 | 2 | -- | -- | -- |
|  |  | *Trigla lyra* | 0.30 | 0.20 | 4 | 0.20 | 0.00 | 5 |
|  | Sessile | Ceriantharia | 0.38 | 0.43 | 148 | 0.37 | 0.24 | 215 |
|  |  | *Myxicola infundibulum* | -- | -- | -- | 0.20 | -- | 1 |
|  |  | Narcomedusae | 0.24 | 0.09 | 5 | 0.25 | 0.11 | 26 |
|  |  | Sabellida | 0.40 | 0.00 | 2 | -- | -- | -- |

| Table 4. PERMANOVA test results showing the effect of protection (Control vs. FNTZs on sessile fauna community composition across study areas. | | | | |
| --- | --- | --- | --- | --- |
| Bat.range | **Area** | **r2** | **f** | **p-value** |
| Shelf edge | Bol_Bru | 0,980 | 18945,444 | 0,001 |
|  | Bol_Terr | 0,984 | 13705,573 | 0,001 |
|  | Mer_Are | 0,888 | 2674,846 | 0,001 |
|  | Mer_Bar | 0,994 | 41692,554 | 0,001 |
|  | Mer_Ros | 0,883 | 5051,922 | 0,001 |
|  | Mer_Vil | 0,965 | 4586,203 | 0,001 |
|  | Rep_BLP | 0,999 | 127477,234 | 0,001 |
| Upper slope | Cig_Bar | 0,999 | 61336,102 | 0,001 |
|  | Cig_Pal | 0,993 | 19646,751 | 0,001 |
|  | Cig_RP | 0,858 | 567,013 | 0,001 |
|  | Cig_Vil | 0,999 | 153861,987 | 0,001 |

| Table 5. PERMANOVA test results showing the effect of protection (Control vs. FNTZs on motile fauna community composition across study areas. | | | | |
| --- | --- | --- | --- | --- |
| Bat.range | **Area** | **r2** | **F** | **p-value** |
| Shelf edge | Bol_Bru | 0,989 | 28558,030 | 0,001 |
|  | Bol_Terr | 0,990 | 40657,261 | 0,001 |
|  | Mer_Are | 0,908 | 2101,623 | 0,001 |
|  | Mer_Bar | 0,998 | 78347,800 | 0,001 |
|  | Mer_Ros | 0,962 | 11895,773 | 0,001 |
|  | Mer_Vil | 0,994 | 34979,388 | 0,001 |
|  | Rep_BLP | 0,986 | 14984,244 | 0,001 |
| Upper slope | Cig_Bar | 0,966 | 3672,375 | 0,001 |
|  | Cig_Pal | 0,984 | 12593,150 | 0,001 |
|  | Cig_RP | 0,744 | 345,953 | 0,001 |
|  | Cig_Vil | 0,998 | 68726,618 | 0,001 |

| Table 6. Results of the Indicator Value (IndVal) and respective p-value. analysis conducted within the study area. categorized according to different levels of environmental protection. | | | | | | |
| --- | --- | --- | --- | --- | --- | --- |
| **Bat.range** | **Area** | **Protection** | **Motility** | **Species** | **IndVal** | ***p* - value** |
| Shelf edge | Bol_Bru | Control | motile | *Argentina sphyraena* | 0.143 | 0.001 |
|  |  |  |  | *Astropecten* spp. | 0.137 | 0.001 |
|  |  |  |  | *Trisopterus capelanus* | 0.017 | 0.001 |
|  |  |  | sessile | *Funiculina quadrangularis* | 0.115 | 0.001 |
|  |  |  |  | *Lytocarpia myriophyllum* | 0.056 | 0.001 |
|  |  |  |  | Pennatulidae | 0.049 | 0.001 |
|  |  | NTZ | motile | *Argentina sphyraena* | 0.052 | 0.001 |
|  |  |  |  | *Parastichopus regalis* | 0.029 | 0.004 |
|  |  |  |  | Gobiidaesp. 1 | 0.025 | 0.001 |
|  |  |  | sessile | *Alcyonium palmatum* | 0.135 | 0.002 |
|  |  |  |  | *Amathia verticillata* | 0.088 | 0.019 |
|  |  |  |  | *Funiculina quadrangularis* | 0.074 | 0.001 |
|  | Bol_Terr | Control | motile | *Trachurus trachurus* | 0.182 | 0.001 |
|  |  |  |  | *Scyliorhinus canicula* | 0.02 | 0.005 |
|  |  |  |  | Sepiolidae | 0.015 | 0.037 |
|  |  |  | sessile | Ceriantharia | 0.055 | 0.002 |
|  |  |  |  | *Lytocarpia myriophyllum* | 0.006 | 0.001 |
|  |  | NTZ | motile | *Argentina sphyraena* | 0.1 | 0.001 |
|  |  |  |  | *Gadiculus argenteus* | 0.065 | 0.001 |
|  |  |  |  | *Trigla lyra* | 0.017 | 0.014 |
|  |  |  | sessile | *Lytocarpia myriophyllum* | 0.233 | 0.001 |
|  |  |  |  | *Suberites carnosus* | 0.112 | 0.005 |
|  |  |  |  | *Suberites syringella* | 0.01 | 0.026 |
|  | Mer_Are | Control | motile | *Astropecten irregularis* | 0.121 | 0.001 |
|  |  |  | motile | *Lesueurigobius suerii* | 0.1 | 0.001 |
|  |  |  | motile | Gobiidae | 0.051 | 0.001 |
|  |  |  | sessile | *Funiculina quadrangularis* | 0.437 | 0.001 |
|  |  |  | sessile | *Pteroeides griseum* | 0.09 | 0.014 |
|  |  |  | sessile | *Andresia partenopea* | 0.04 | 0.001 |
|  |  | NTZ | motile | Gobiidaesp. 1 | 0.039 | 0.001 |
|  |  |  |  | *Goneplax rhomboides* | 0.024 | 0.001 |
|  |  |  |  | *Argentina sphyraena* | 0.021 | 0.001 |
|  |  |  | sessile | *Funiculina quadrangularis* | 0.315 | 0.001 |
|  |  |  |  | *Diazona violacea* | 0.253 | 0.001 |
|  |  |  |  | Yellow fan-shaped Bryozoa | 0.243 | 0.001 |
|  | Mer_Bar | Control | motile | *Serranus hepatus* | 0.054 | 0.001 |
|  |  |  |  | *Goneplax rhomboides* | 0.051 | 0.001 |
|  |  |  |  | *Trisopterus capelanus* | 0.042 | 0.001 |
|  |  |  | sessile | Sabellida | 0.071 | 0.001 |
|  |  |  |  | *Alcyonium palmatum* | 0.071 | 0.002 |
|  |  |  |  | *Lytocarpia myriophyllum* | 0.007 | 0.001 |
|  |  | NTZ | motile | *Crystallogobius linearis* | 0.05 | 0.001 |
|  |  |  |  | *Argentina sphyraena* | 0.03 | 0.001 |
|  |  |  |  | *Microchirus variegatus* | 0.024 | 0.005 |
|  |  |  | sessile | Bryozoa | 0.378 | 0.001 |
|  |  |  |  | Filograninae | 0.116 | 0.007 |
|  |  |  |  | Hydrozoa | 0.092 | 0.015 |
|  | Mer_Ros | Control | motile | Gobiidae | 0.184 | 0.001 |
|  |  |  |  | *Astropecten irregularis* | 0.048 | 0.001 |
|  |  |  |  | Pleuronectiformes | 0.042 | 0.002 |
|  |  |  | sessile | Pennatulidae | 0.339 | 0.001 |
|  |  |  |  | *Cavernularia pusilla* | 0.3 | 0.001 |
|  |  |  |  | *Alcyonium palmatum* | 0.176 | 0.002 |
|  |  | NTZ | motile | *Spatangus purpureus* | 0.046 | 0.002 |
|  |  |  |  | *Goneplax rhomboides* | 0.032 | 0.001 |
|  |  |  |  | Gobiidae sp. 1 | 0.032 | 0.001 |
|  |  |  | sessile | *Andresia partenopea* | 0.167 | 0.001 |
|  |  |  |  | *Alcyonium palmatum* | 0.146 | 0.002 |
|  |  |  |  | Porifera | 0.114 | 0.005 |
|  | Mer_Vil | Control | motile | *Argentina sphyraena* | 0.106 | 0.001 |
|  |  |  |  | *Gadiculus argenteus* | 0.022 | 0.001 |
|  |  |  |  | *Scyliorhinus canicula* | 0.009 | 0.005 |
|  |  |  | sessile | Sabellida | 0.548 | 0.001 |
|  |  |  |  | Crinoidea | 0.015 | 0.001 |
|  |  |  |  | *Myxicola infundibulum* | 0.007 | 0.007 |
|  |  | NTZ | motile | *Gracilechinus acutus* | 0.447 | 0.001 |
|  |  |  |  | *Ophiocomina nigra* | 0.113 | 0.001 |
|  |  |  |  | *Ophiura ophiura* | 0.051 | 0.001 |
|  |  |  | sessile | Crinoidea | 0.772 | 0.001 |
|  |  |  |  | Ceriantharia | 0.004 | 0.002 |
|  |  |  |  | *Pteroeides griseum* | 0.004 | 0.014 |
|  | Rep_BLP | Control | motile | *Trachurus trachurus* | 0.182 | 0.001 |
|  |  |  |  | *Scyliorhinus canicula* | 0.02 | 0.005 |
|  |  |  |  | Sepiolidae | 0.015 | 0.037 |
|  |  |  | sessile | Ceriantharia | 0.055 | 0.002 |
|  |  |  |  | *Lytocarpia myriophyllum* | 0.006 | 0.001 |
|  |  | NTZ | motile | *Gadiculus argenteus* | 0.055 | 0.001 |
|  |  |  |  | *Arnoglossus rueppelii* | 0.047 | 0.001 |
|  |  |  |  | *Lepidorhombus whiffiagonis* | 0.033 | 0.005 |
|  |  |  | sessile | *Myxicola infundibulum* | 0.092 | 0.007 |
|  |  |  |  | *Suberites syringella* | 0.083 | 0.026 |
|  |  |  |  | Porifera | 0.014 | 0.005 |
